# Supplementary material
Source: publisher figshare collection journal article supplement (https://acs.figshare.com/ndownloader/files/4600936)

## SUPPORTING INFO

XPac comparison of the single crystal analysis of  $\alpha\beta$ -D-lactose with that obtained from powder data (green). Note the difference in orientation of the oxygen of the CH<sub>2</sub>OH group on the glucose ring of the  $\alpha$  anomer (circled).

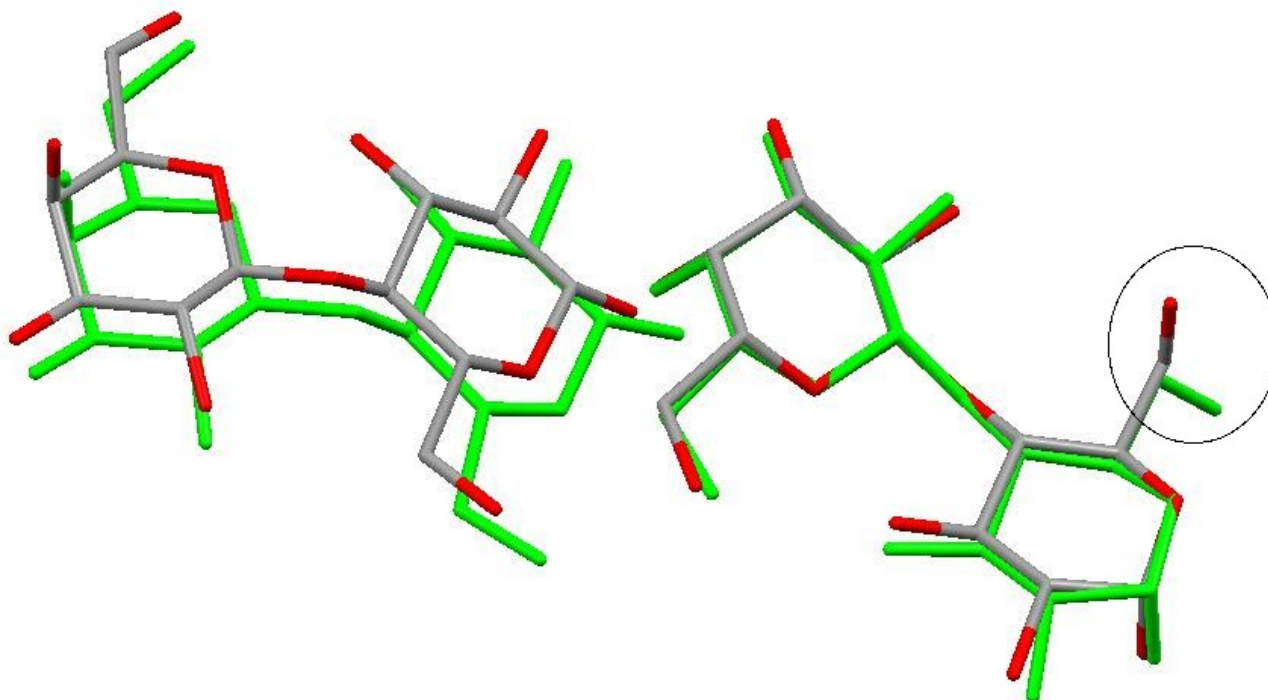

CHECK CIF OUTPUT from IUCr for both structures. Note ORTEPs at end.

## checkCIF/PLATON report (publication check)

No syntax errors found.

Please wait while processing ....

[CIF dictionary](#)

[Interpreting this report](#)

### Datablock: 1-deoxy-D-lactose

---

|                 |                                                |                    |
|-----------------|------------------------------------------------|--------------------|
| Bond precision: | C-C = 0.0030 Å                                 | Wavelength=0.71073 |
| Cell:           | a=4.6930(1)      b=19.9373(4)      c=7.5503(2) |                    |
|                 | alpha=90      beta=103.159(1)      gamma=90    |                    |
|                 | Calculated                                     | Reported           |
| Volume          | 687.90(3)                                      | 687.90(3)          |
| Space group     | P 21                                           | P 21               |
| Hall group      | P 2yb                                          | P 2yb              |
| Moiety formula  | C12 H22 O10                                    | C12 H22 O10        |
| Sum formula     | C12 H22 O10                                    | C12 H22 O10        |

|           |             |             |
|-----------|-------------|-------------|
| Mr        | 326.30      | 326.30      |
| Dx,g cm-3 | 1.575       | 1.575       |
| Z         | 2           | 2           |
| Mu (mm-1) | 0.139       | 0.139       |
| F000      | 348.0       | 348.0       |
| F000'     | 348.26      |             |
| h,k,lmax  | 6,25,9      | 6,25,9      |
| Nref      | 1616( 3141) | 1614        |
| Tmin,Tmax | 0.953,0.986 | 0.953,0.986 |
| Tmin'     | 0.953       |             |

Correction method= AbsCorr=MULTI-SCAN

Data completeness= 1.00(0.51) Theta(max)= 27.470

R(reflections)= 0.0269( 1528) wR2(reflections)= 0.0676( 1614)

S = 1.066 Npar= 207

The following ALERTS were generated. Each ALERT has the format  
**test-name ALERT-alert-type-alert-level**.  
Click on the hyperlinks for more details of the test.

### ●Alert level C

|                                   |                                                       |      |
|-----------------------------------|-------------------------------------------------------|------|
| <a href="#">STRVA01_ALERT_4_C</a> | Flack parameter is too small                          |      |
|                                   | From the CIF: _refine_ls_abs_structure_Flack -0.300   |      |
|                                   | From the CIF: _refine_ls_abs_structure_Flack_su 0.900 |      |
| <a href="#">PLAT032_ALERT_4_C</a> | Std. Uncertainty in Flack Parameter too High ...      | 0.90 |
| <a href="#">PLAT066_ALERT_1_C</a> | Predicted and Reported Transmissions Identical .      | ?    |
| <a href="#">PLAT089_ALERT_3_C</a> | Poor Data / Parameter Ratio (Zmax .LT. 18) .....      | 7.80 |
| <a href="#">PLAT720_ALERT_4_C</a> | Number of Unusual/Non-Standard Label(s) .....         | 5    |

### ●Alert level G

|                                   |                                                                                                                                                                                           |        |
|-----------------------------------|-------------------------------------------------------------------------------------------------------------------------------------------------------------------------------------------|--------|
| <a href="#">REFLT03_ALERT_4_G</a> | Please check that the estimate of the number of Friedel pairs is correct. If it is not, please give the correct count in the _publ_section_exptl_refinement section of the submitted CIF. |        |
|                                   | From the CIF: _diffrn_reflths_theta_max                                                                                                                                                   | 27.47  |
|                                   | From the CIF: _reflns_number_total                                                                                                                                                        | 1614   |
|                                   | Count of symmetry unique reflns                                                                                                                                                           | 1616   |
|                                   | Completeness (_total/calc)                                                                                                                                                                | 99.88% |
|                                   | TEST3: Check Friedels for noncentro structure                                                                                                                                             |        |
|                                   | Estimate of Friedel pairs measured                                                                                                                                                        | 0      |
|                                   | Fraction of Friedel pairs measured                                                                                                                                                        | 0.000  |
|                                   | Are heavy atom types Z>Si present                                                                                                                                                         | no     |
| <a href="#">PLAT791_ALERT_1_G</a> | Confirm the Absolute Configuration of C1'                                                                                                                                                 | = . S  |
| <a href="#">PLAT791_ALERT_1_G</a> | Confirm the Absolute Configuration of C2                                                                                                                                                  | = . S  |
| <a href="#">PLAT791_ALERT_1_G</a> | Confirm the Absolute Configuration of C2'                                                                                                                                                 | = . R  |
| <a href="#">PLAT791_ALERT_1_G</a> | Confirm the Absolute Configuration of C3                                                                                                                                                  | = . R  |
| <a href="#">PLAT791_ALERT_1_G</a> | Confirm the Absolute Configuration of C3'                                                                                                                                                 | = . S  |
| <a href="#">PLAT791_ALERT_1_G</a> | Confirm the Absolute Configuration of C4                                                                                                                                                  | = . S  |
| <a href="#">PLAT791_ALERT_1_G</a> | Confirm the Absolute Configuration of C4'                                                                                                                                                 | = . R  |
| <a href="#">PLAT791_ALERT_1_G</a> | Confirm the Absolute Configuration of C5                                                                                                                                                  | = . R  |
| <a href="#">PLAT791_ALERT_1_G</a> | Confirm the Absolute Configuration of C5'                                                                                                                                                 | = . R  |
| <a href="#">PLAT860_ALERT_3_G</a> | Note: Number of Least-Squares Restraints .....                                                                                                                                            | 1      |

- 0 **ALERT level A** = In general: serious problem
- 0 **ALERT level B** = Potentially serious problem
- 5 **ALERT level C** = Check and explain
- 11 **ALERT level G** = General alerts; check

- 10 ALERT type 1 CIF construction/syntax error, inconsistent or missing data
- 0 ALERT type 2 Indicator that the structure model may be wrong or deficient
- 2 ALERT type 3 Indicator that the structure quality may be low
- 4 ALERT type 4 Improvement, methodology, query or suggestion
- 0 ALERT type 5 Informative message, check

# Datablock: alpha-beta-lactose

Bond precision: C-C = 0.0072 Å Wavelength=0.69110  
Cell: a=5.030(3) b=7.593(5) c=19.374(12)  
alpha=81.026(10) beta=85.044(9) gamma=74.247(9)

|                        | Calculated  | Reported    |
|------------------------|-------------|-------------|
| Volume                 | 702.7(8)    | 702.7(8)    |
| Space group            | P 1         | P 1         |
| Hall group             | P 1         | P 1         |
| Moiety formula         | C12 H22 O11 | C12 H22 O11 |
| Sum formula            | C12 H22 O11 | C12 H22 O11 |
| Mr                     | 342.30      | 342.30      |
| Dx, g cm <sup>-3</sup> | 1.618       | 1.618       |
| Z                      | 2           | 2           |
| Mu (mm <sup>-1</sup> ) | 0.161       | 0.145       |
| F000                   | 364.0       | 364.0       |
| F000'                  | 363.97      |             |
| h,k,lmax               | 7,10,27     | 7,10,27     |
| Nref                   | 4309( 8618) | 4678        |
| Tmin,Tmax              | 0.953,0.986 | 0.953,0.986 |
| Tmin'                  | 0.953       |             |

Correction method= AbsCorr=MULTI-SCAN

Data completeness= 1.09(0.54) Theta(max)= 29.620

R(reflections)= 0.0746( 4292) wR2(reflections)= 0.2067( 4678)

S = 1.046 Npar= 432

The following ALERTS were generated. Each ALERT has the format

**test-name\_ALERT\_alert-type\_alert-level.**

Click on the hyperlinks for more details of the test.

## Alert level A

[PLAT029\\_ALERT\\_3\\_A](#) \_diffrn\_measured\_fraction\_theta\_full Low ..... 0.81

## Alert level B

[DIFMX01\\_ALERT\\_2\\_B](#) The maximum difference density is > 0.1\*ZMAX\*1.00

\_refine\_diff\_density\_max given = 0.915

Test value = 0.800

|                                   |                                                  |                       |
|-----------------------------------|--------------------------------------------------|-----------------------|
| <a href="#">PLAT024_ALERT_4_B</a> | Merging of Friedel Pairs is STRONGLY Indicated . | !                     |
| <a href="#">PLAT097_ALERT_2_B</a> | Maximum (Positive) Residual Density .....        | 0.92 e/Å <sup>3</sup> |
| <a href="#">PLAT222_ALERT_3_B</a> | Large Non-Solvent H Ueq(max)/Ueq(min) ...        | 4.37 Ratio            |
| <a href="#">PLAT415_ALERT_2_B</a> | Short Inter D-H..H-X H6C .. H11A ..              | 1.99 Ang.             |
| <a href="#">PLAT417_ALERT_2_B</a> | Short Inter D-H..H-D H3B .. H6' ..               | 1.54 Ang.             |
| <a href="#">PLAT417_ALERT_2_B</a> | Short Inter D-H..H-D H12B .. H16' ..             | 1.50 Ang.             |
| <a href="#">PLAT420_ALERT_2_B</a> | D-H Without Acceptor O1 - H1A ...                | ?                     |

## Alert level C

[DIFMX02\\_ALERT\\_1\\_C](#) The maximum difference density is > 0.1\*ZMAX\*0.75

The relevant atom site should be identified.

[STRVA01\\_ALERT\\_4\\_C](#) Flack test results are meaningless.

From the CIF: \_refine\_ls\_abs\_structure\_Flack 0.100

From the CIF: \_refine\_ls\_abs\_structure\_Flack\_su 1.400

|                                   |                                                  |            |
|-----------------------------------|--------------------------------------------------|------------|
| <a href="#">PLAT032_ALERT_4_C</a> | Std. Uncertainty in Flack Parameter too High ... | 1.40       |
| <a href="#">PLAT094_ALERT_2_C</a> | Ratio of Maximum / Minimum Residual Density .... | 2.14       |
| <a href="#">PLAT220_ALERT_2_C</a> | Large Non-Solvent O Ueq(max)/Ueq(min) ...        | 3.26 Ratio |
| <a href="#">PLAT230_ALERT_2_C</a> | Hirshfeld Test Diff for O11 - C11 ..             | 5.24 su    |
| <a href="#">PLAT340_ALERT_3_C</a> | Low Bond Precision on C-C Bonds (x 1000) Ang ... | 7          |
| <a href="#">PLAT414_ALERT_2_C</a> | Short Intra D-H..H-X H1A .. H5 ..                | 1.98 Ang.  |

---

## ●Alert level G

ABSMU\_01 Radiation type not identified. Calculation of  
\_exptl\_absorpt\_correction\_mu not performed.

[REFLT03\\_ALERT\\_4\\_G](#) ALERT: MoKa measured Friedel data cannot be used to  
determine absolute structure in a light-atom  
study EXCEPT under VERY special conditions.  
It is preferred that Friedel data is merged in such cases.

From the CIF: \_diffrn\_reflns\_theta\_max 29.62

From the CIF: \_reflns\_number\_total 4678

Count of symmetry unique reflns 4309

Completeness (\_total/calc) 108.56%

TEST3: Check Friedels for noncentro structure

Estimate of Friedel pairs measured 369

Fraction of Friedel pairs measured 0.086

Are heavy atom types Z>Si present no

|                                   |                                                |     |   |
|-----------------------------------|------------------------------------------------|-----|---|
| <a href="#">PLAT791_ALERT_1_G</a> | Confirm the Absolute Configuration of C1       | = . | S |
| <a href="#">PLAT791_ALERT_1_G</a> | Confirm the Absolute Configuration of C1'      | = . | S |
| <a href="#">PLAT791_ALERT_1_G</a> | Confirm the Absolute Configuration of C2       | = . | R |
| <a href="#">PLAT791_ALERT_1_G</a> | Confirm the Absolute Configuration of C2'      | = . | R |
| <a href="#">PLAT791_ALERT_1_G</a> | Confirm the Absolute Configuration of C3       | = . | R |
| <a href="#">PLAT791_ALERT_1_G</a> | Confirm the Absolute Configuration of C3'      | = . | S |
| <a href="#">PLAT791_ALERT_1_G</a> | Confirm the Absolute Configuration of C4       | = . | S |
| <a href="#">PLAT791_ALERT_1_G</a> | Confirm the Absolute Configuration of C4'      | = . | R |
| <a href="#">PLAT791_ALERT_1_G</a> | Confirm the Absolute Configuration of C5       | = . | R |
| <a href="#">PLAT791_ALERT_1_G</a> | Confirm the Absolute Configuration of C5'      | = . | R |
| <a href="#">PLAT791_ALERT_1_G</a> | Confirm the Absolute Configuration of C11      | = . | R |
| <a href="#">PLAT791_ALERT_1_G</a> | Confirm the Absolute Configuration of C11'     | = . | S |
| <a href="#">PLAT791_ALERT_1_G</a> | Confirm the Absolute Configuration of C12      | = . | R |
| <a href="#">PLAT791_ALERT_1_G</a> | Confirm the Absolute Configuration of C12'     | = . | R |
| <a href="#">PLAT791_ALERT_1_G</a> | Confirm the Absolute Configuration of C13      | = . | R |
| <a href="#">PLAT791_ALERT_1_G</a> | Confirm the Absolute Configuration of C13'     | = . | S |
| <a href="#">PLAT791_ALERT_1_G</a> | Confirm the Absolute Configuration of C14      | = . | S |
| <a href="#">PLAT791_ALERT_1_G</a> | Confirm the Absolute Configuration of C14'     | = . | R |
| <a href="#">PLAT791_ALERT_1_G</a> | Confirm the Absolute Configuration of C15      | = . | R |
| <a href="#">PLAT791_ALERT_1_G</a> | Confirm the Absolute Configuration of C15'     | = . | R |
| <a href="#">PLAT860_ALERT_3_G</a> | Note: Number of Least-Squares Restraints ..... |     | 3 |

---

1 **ALERT level A** = In general: serious problem

8 **ALERT level B** = Potentially serious problem

8 **ALERT level C** = Check and explain

22 **ALERT level G** = General alerts; check

21 ALERT type 1 CIF construction/syntax error, inconsistent or missing data

10 ALERT type 2 Indicator that the structure model may be wrong or deficient

4 ALERT type 3 Indicator that the structure quality may be low

4 ALERT type 4 Improvement, methodology, query or suggestion

0 ALERT type 5 Informative message, check

---

## checkCIF publication errors

---

### ●Alert level A

[PUBL008\\_ALERT\\_1\\_A](#) \_publ\_section\_title is missing. Title of paper.

[PUBL012\\_ALERT\\_1\\_A](#) \_publ\_section\_abstract is missing.

Abstract of paper in English.

---

### ●Alert level G

[PUBL013\\_ALERT\\_1\\_G](#) The \_publ\_section\_comment (discussion of study) is  
missing. This is required for a full paper submission (but is  
optional for an electronic paper).

[PUBL017\\_ALERT\\_1\\_G](#) The \_publ\_section\_references section is missing or  
empty.

---

- 2 **ALERT level A** = Data missing that is essential or data in wrong format  
2 **ALERT level G** = General alerts. Data that may be required is missing
- 

## Publication of your CIF

You should always attempt to resolve as many as possible of the alerts in all categories. Often the minor alerts point to easily fixed oversights, errors and omissions in your CIF or refinement strategy, so attention to these fine details can be worthwhile. In order to resolve some of the more serious problems it may be necessary to carry out additional measurements or structure refinements. However, the nature of your study may justify the reported deviations from the submission requirements of the journal and these should be commented upon in the discussion or experimental section of a paper - after all, they might represent an interesting feature.

If level A alerts remain, which you believe to be justified deviations, and you intend to submit this CIF for publication in Acta Crystallographica Section C or Section E, you should additionally insert an explanation in your CIF using the Validation Reply Form (VRF) below. Your explanation will be considered as part of the review process.

If you intend to submit to another section of Acta Crystallographica or Journal of Applied Crystallography or Journal of Synchrotron Radiation, you should make sure that at least a [basic structural check](#) is run on the final version of your CIF prior to submission.

```
# start Validation Reply Form
_vrf_PUBL008_GLOBAL
;
PROBLEM: _publ_section_title is missing. Title of paper.
RESPONSE: ...
;
_vrf_PUBL012_GLOBAL
;
PROBLEM: _publ_section_abstract is missing.
RESPONSE: ...
;
_vrf_PLAT029_alpha-beta-lactose
;
PROBLEM: _diffrn_measured_fraction_theta_full Low ..... 0.81
RESPONSE: ...
;
# end Validation Reply Form
```

If you wish to submit your CIF for publication in Acta Crystallographica Section C or E, you should upload your CIF via [the web](#). If your CIF is to form part of a submission to another IUCr journal, you will be asked, either during electronic [submission](#) or by the Co-editor handling your paper, to upload your CIF via our web site.

---

**PLATON version of 23/04/2007; check.def file version of 23/04/2007**

## Datablock 1-deoxy-D-lactose - ellipsoid plot

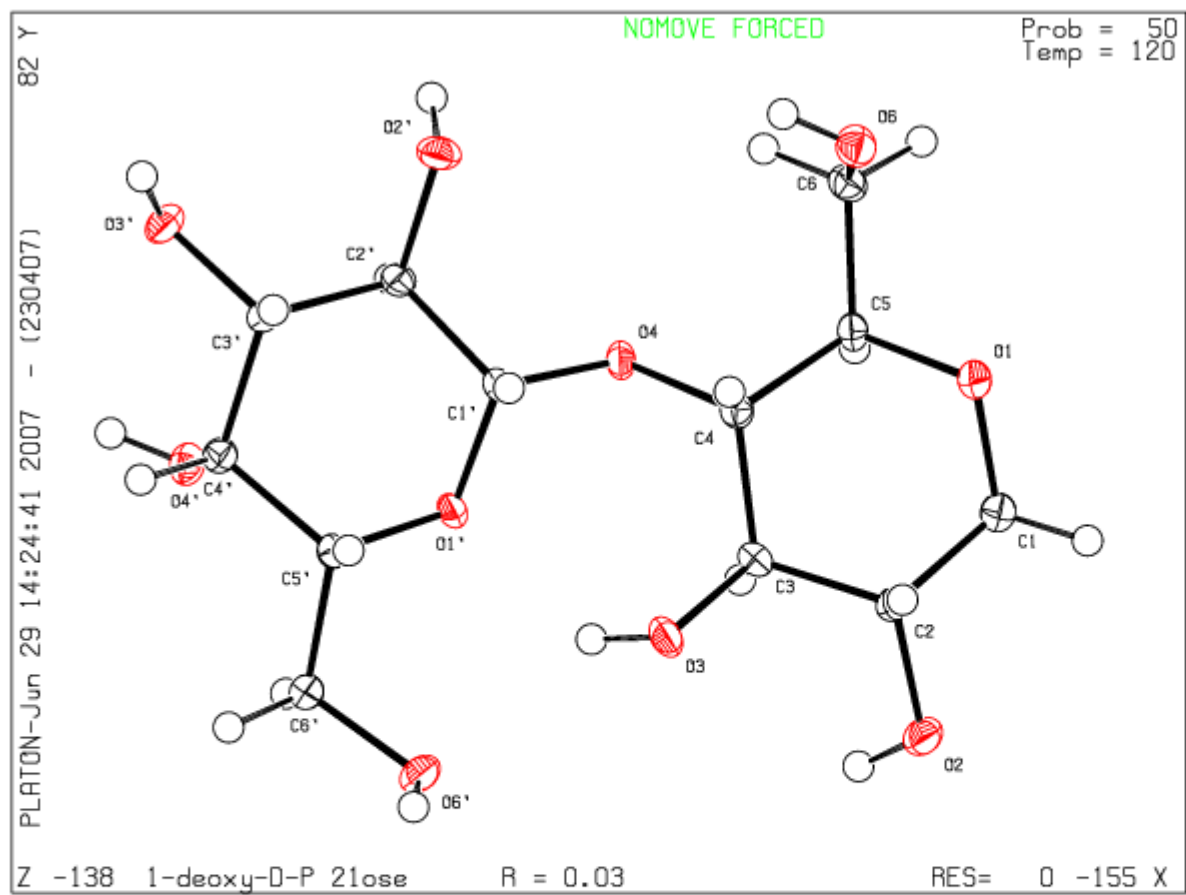

**Datablock alpha-beta-lactose - ellipsoid plot**

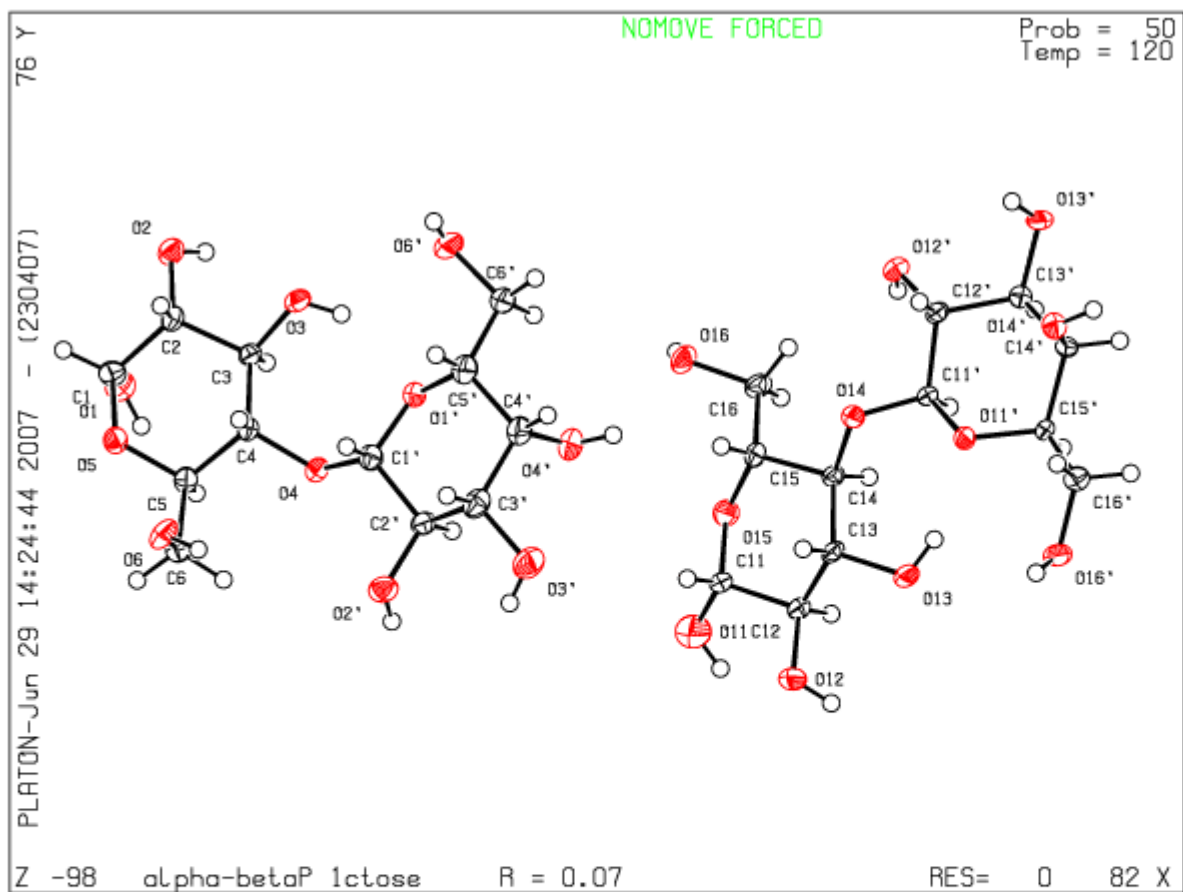

Supplement: Supplementary file 1 [file 4600936]
